# Supplementary material
Source: HighWire-hosted journal article supplement (https://jnm.snmjournals.org/highwire/filestream/103412/field_highwire_adjunct_files/0/261016_Supplemental_Data.pdf)
Supplement: 261016_Supplemental_Data.pdf [file 261016_Supplemental_Data.pdf]

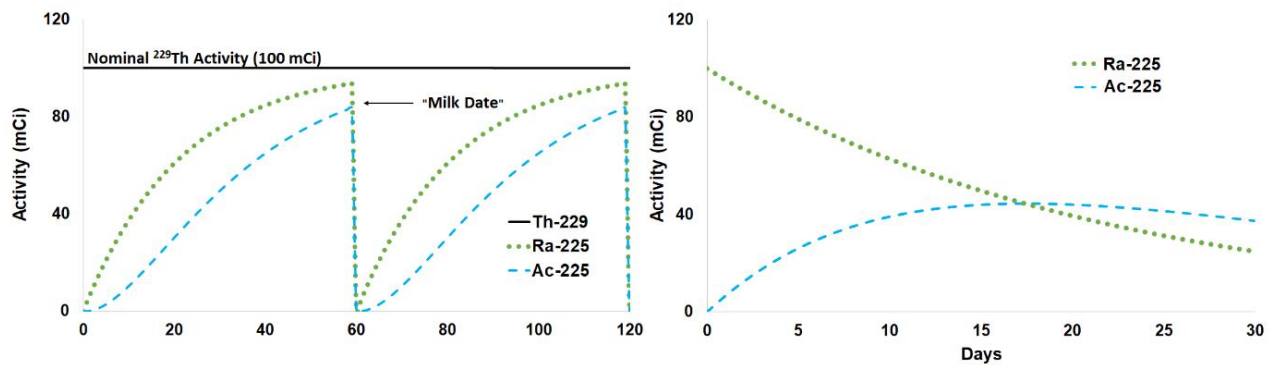

*SUPPLEMENTAL FIGURE 1. In-growth of <sup>225</sup>Ra and <sup>225</sup>Ac from <sup>229</sup>Th generator, with milking performed at 60 days (left), and in-growth of <sup>225</sup>Ac from <sup>225</sup>Ra generator (right).*

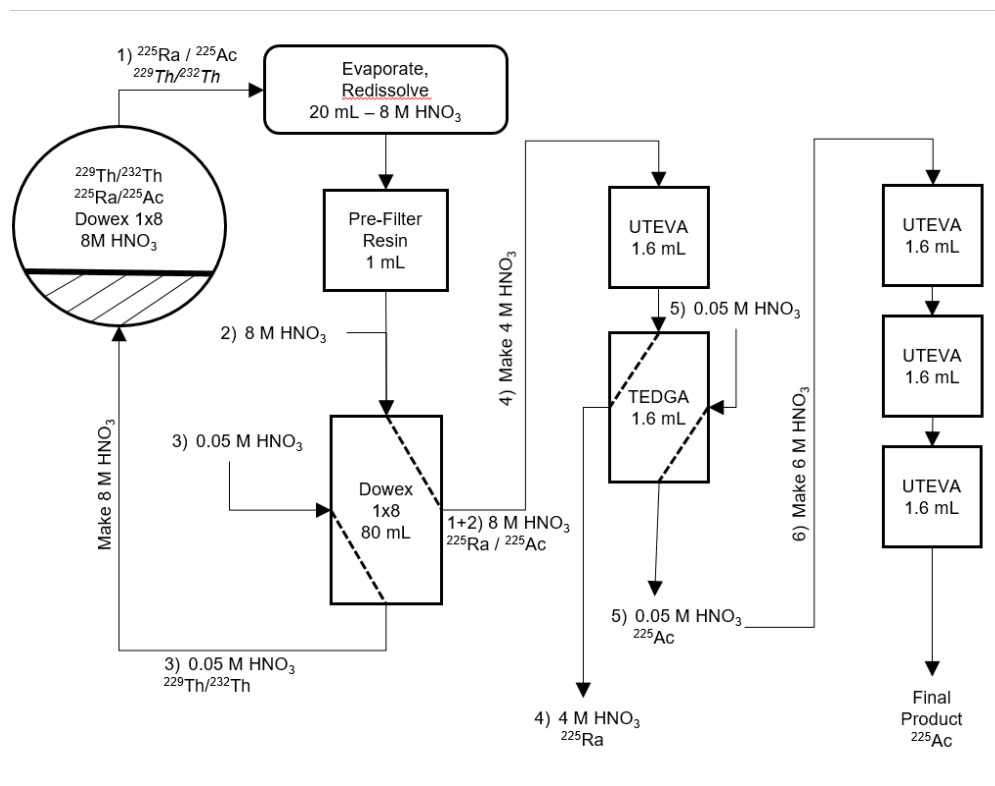

*SUPPLEMENTAL FIGURE 2. Process schematic for isolation of <sup>225</sup>Ac from <sup>229</sup>Th decay as performed at ITU.*

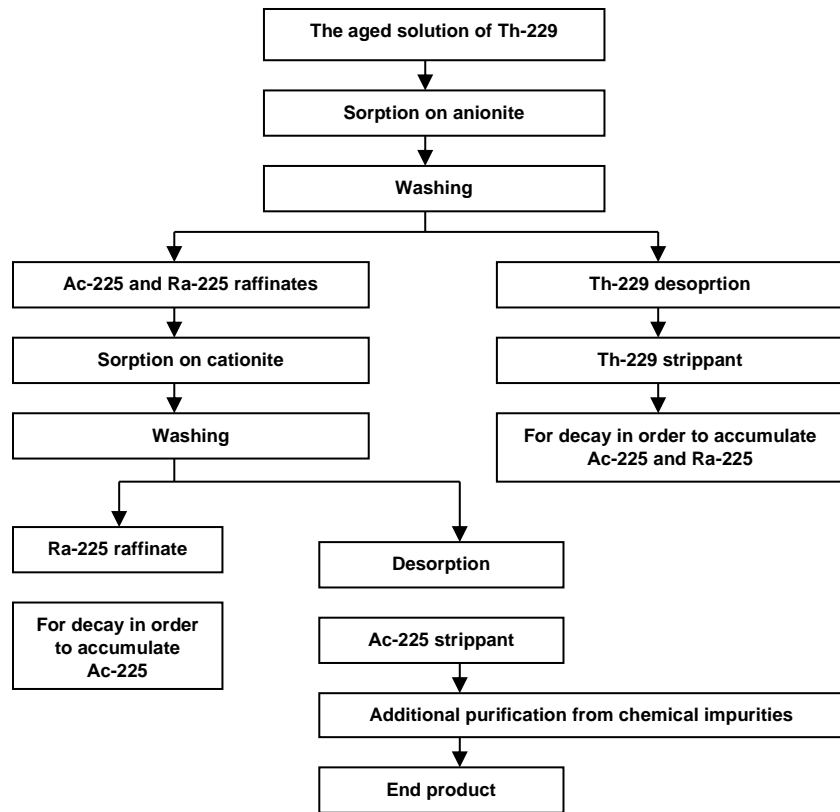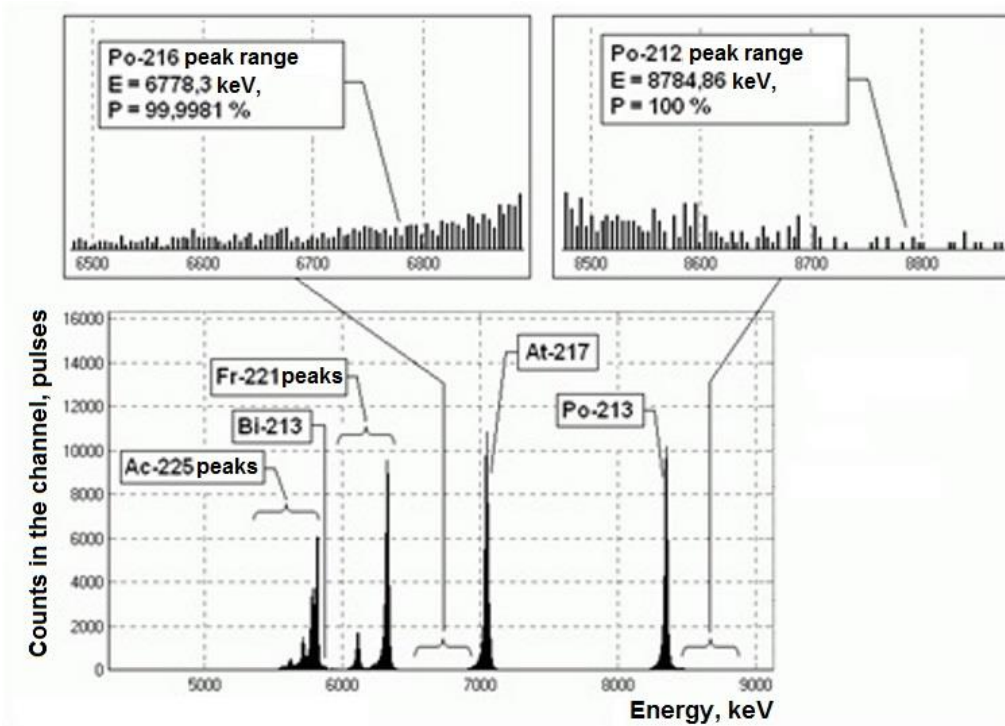

SUPPLEMENTAL FIGURE 3. Process schematic for isolation of  $^{225}\text{Ac}$  from  $^{229}\text{Th}$  decay as performed at IPPE (top). Alpha-spectrum of  $^{225}\text{Ac}$  end product (no peaks of  $^{216}\text{Po}$  and  $^{212}\text{Po}$ ) (bottom).

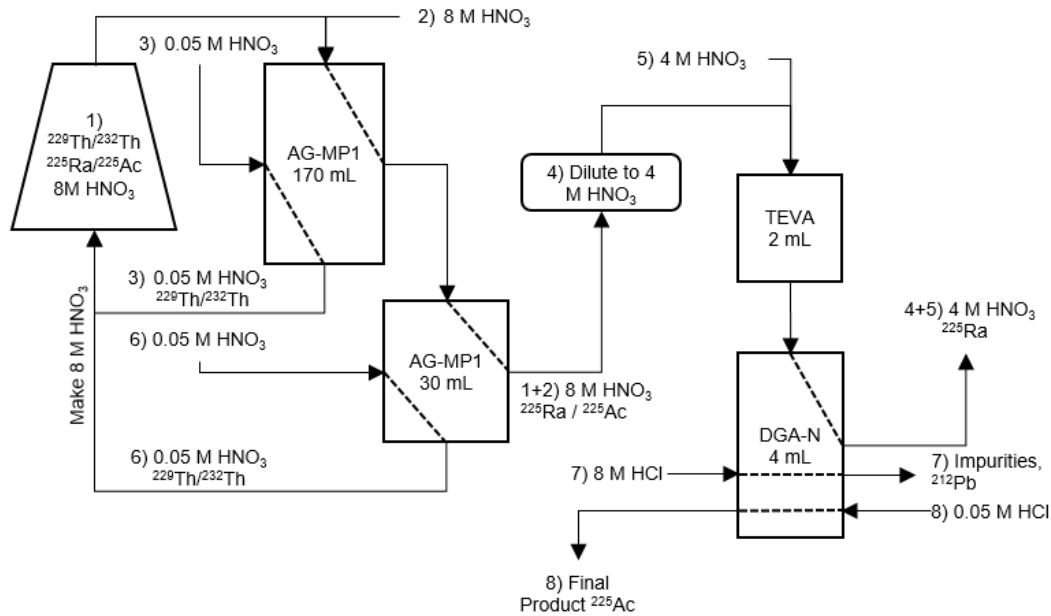

SUPPLEMENTAL FIGURE 4. Process schematic for isolation of  $^{225}\text{Ac}$  from  $^{229}\text{Th}$  decay as performed at CNL.

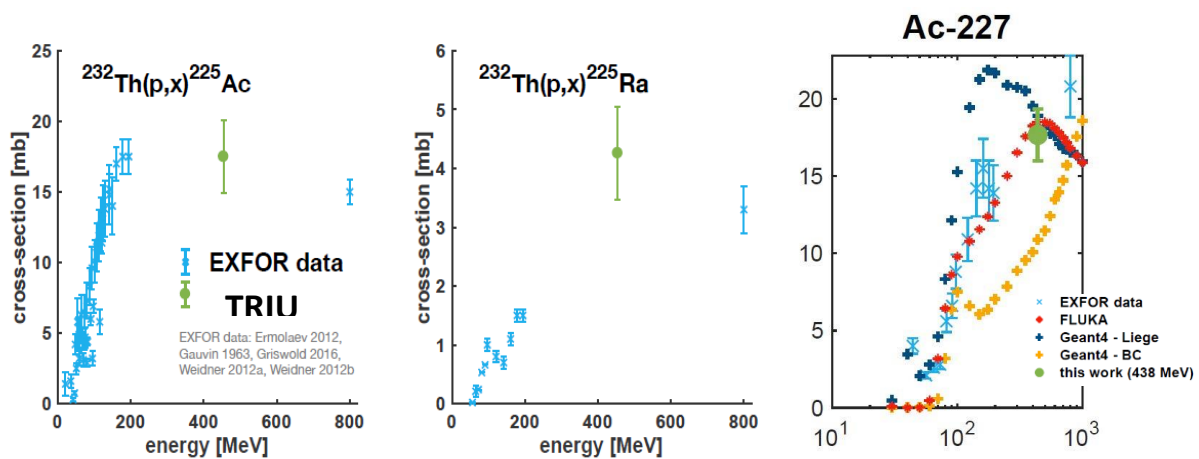

SUPPLEMENTAL FIGURE 5. Cross sections for  $^{225}\text{Ac}$  and  $^{225}\text{Ra}$  production via proton irradiation of  $^{232}\text{Th}$ .

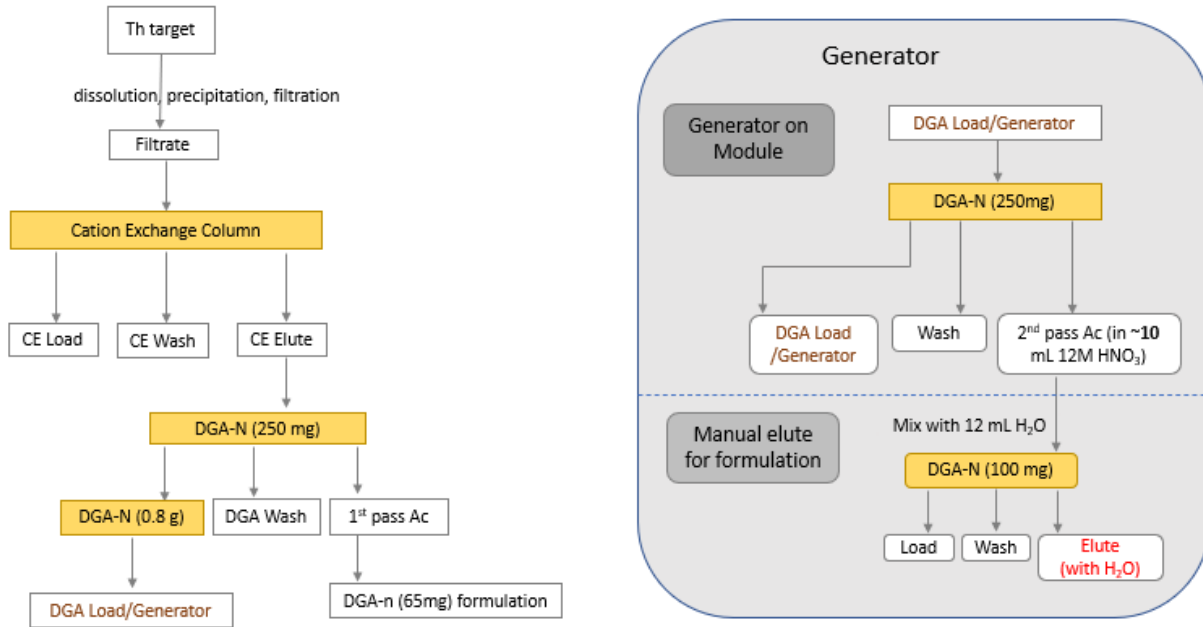

*SUPPLEMENTAL FIGURE 6. Separation scheme of  $^{225}\text{Ra}$  from irradiated  $^{232}\text{Th}$  target and subsequent  $^{225}\text{Ra}/^{225}\text{Ac}$  generator at TRIUMF.*

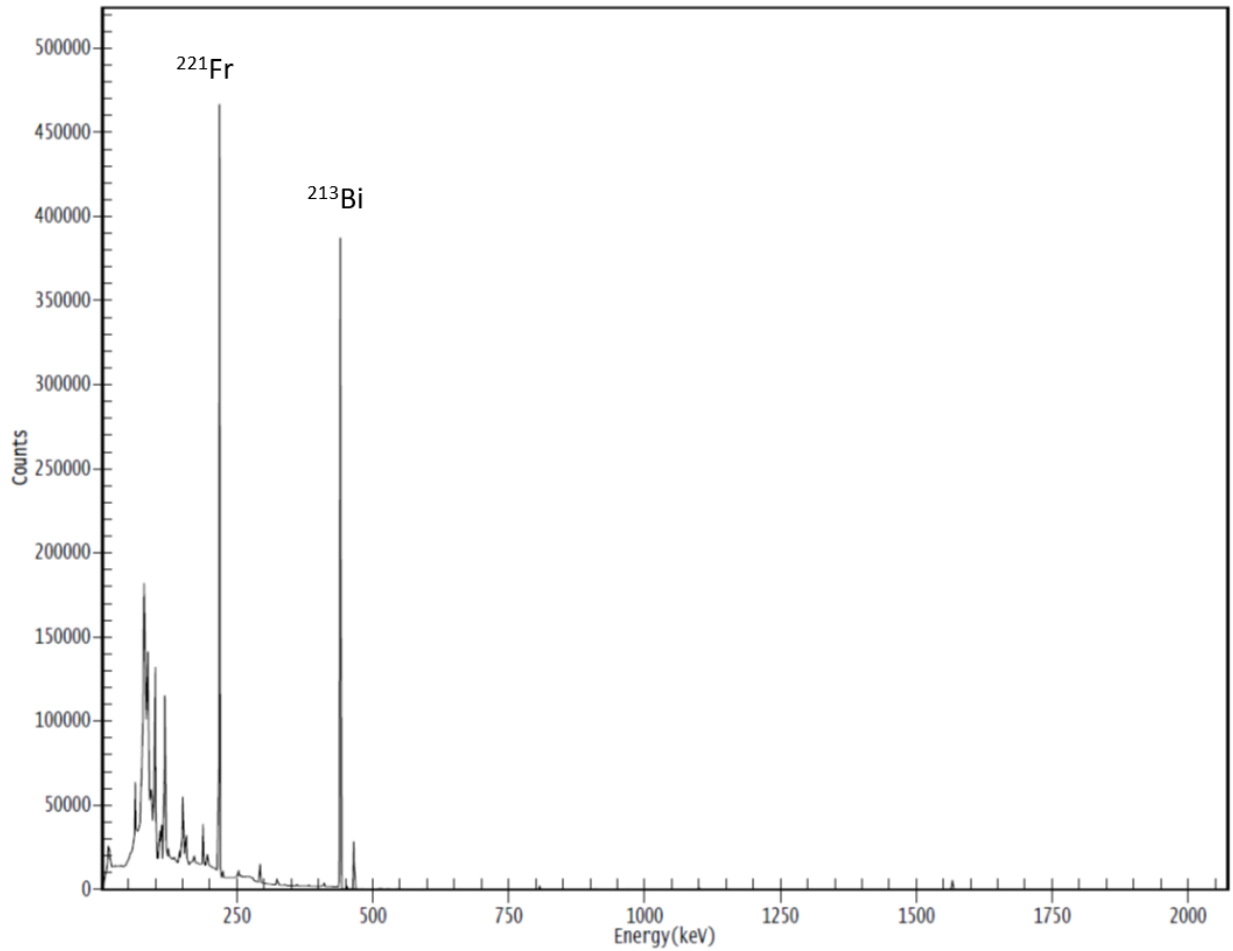

SUPPLEMENTAL FIGURE 7. Gamma spectrum of purified  $^{225}\text{Ac}$  at TRIUMF.

SUPPLEMENTAL TABLE 1. Thorium Relative Mass Isotopics and Alpha Dose for Current and New Material at ORNL.

| Th source                  | $^{228}\text{Th}$ | $^{229}\text{Th}$ | $^{230}\text{Th}$ | $^{231}\text{Th}$ | $^{232}\text{Th}$ | eV/s for 1 mg from alpha decay |
|----------------------------|-------------------|-------------------|-------------------|-------------------|-------------------|--------------------------------|
| New Material               | 0.0399            | 59.5              | 0.454             | 1.21E-12          | 40.0              | 8.92E13                        |
| Current Generator Material | 0                 | 0.66              | 0                 | 0                 | 99.34             | 2.49E11                        |
